# Supplementary material for: Synthesis of MgAC-Fe3O4/TiO2 hybrid nanocomposites via sol-gel chemistry for water treatment by photo-Fenton and photocatalytic reactions
Source: PubMed Central journal article supplement (PMC6694146; doi:10.1038/s41598-019-48398-5), 2019-08-14
Supplement: 41598_2019_48398_MOESM1_ESM.pdf [file 41598_2019_48398_MOESM1_ESM.pdf]

**Synthesis of MgAC-Fe<sub>3</sub>O<sub>4</sub>/TiO<sub>2</sub> hybrid nanocomposites via sol-gel chemistry for water treatment by photo-Fenton and photocatalytic reactions**

**Supporting Information**

Vu Khac Hoang Bui<sup>1</sup>, Duckshin Park<sup>2</sup>, Tuyet Nhung Pham<sup>1</sup>, Yejin An<sup>3</sup>, Jin Seok Choi<sup>4</sup>, Hyun Uk Lee<sup>5</sup>, Oh-Hyeok Kwon<sup>6</sup>, Ju-Young Moon<sup>6</sup>, Ki-Tae Kim<sup>3\*</sup>, and Young-Chul Lee<sup>1\*</sup>

<sup>1</sup> Department of BioNano Technology, Gachon University, 1342 Seongnamdaero, Sujeong-gu, Seongnam-si, Gyeonggi-do 13120, Republic of Korea; [hoangvu210190@gmail.com](mailto:hoangvu210190@gmail.com); [nhungpham240694@gmail.com](mailto:nhungpham240694@gmail.com)

<sup>2</sup> Korea Railroad Research Institute (KRRRI), 176 Cheoldobakmulkwon-ro, Uiwang-si 16150, Gyeonggi-do, Republic of Korea; [dspark@krri.re.kr](mailto:dspark@krri.re.kr)

<sup>3</sup> Department of Environmental Engineering, Seoul National University of Science and Technology, 232 Gongneung-ro, Nowon-gu, Seoul 01811, Republic of Korea; [yejin33@seoultech.ac.kr](mailto:yejin33@seoultech.ac.kr)

<sup>4</sup> Analysis Center for Research Advancement, Korea Advanced Institute of Science and Technology (KAIST), Yuseong-gu, Daejeon 34141, Republic of Korea; [ffband@kaist.ac.kr](mailto:ffband@kaist.ac.kr)

<sup>5</sup> Advanced Nano-surface Research Group, Korea Basic Science Institute (KBSI), Daejeon 34133, Republic of Korea; [leehe@kbsi.re.kr](mailto:leehe@kbsi.re.kr)

<sup>6</sup> Department Beauty Design Management, Hansung University, 116 Samseongyoro-16gil, Seoul 02876, Republic of Korea; [beauty67@hansung.ac.kr](mailto:beauty67@hansung.ac.kr); [bora7033@naver.com](mailto:bora7033@naver.com)

\*Correspondence:

Prof. Ki-Tae Kim; Email: [ktkim@seoultech.ac.kr](mailto:ktkim@seoultech.ac.kr); Tel: +82-2-970-6642 (K.-T.K.); Fax: +82-2-971-5776 (K.-T.K.)

Prof. Young-Chul Lee; Email: [dreamdb@gachon.ac.kr](mailto:dreamdb@gachon.ac.kr); Tel: +82-31-750-8751 (Y.-C. L.); Fax: +82-31-750-4748 (Y.-C. L.)

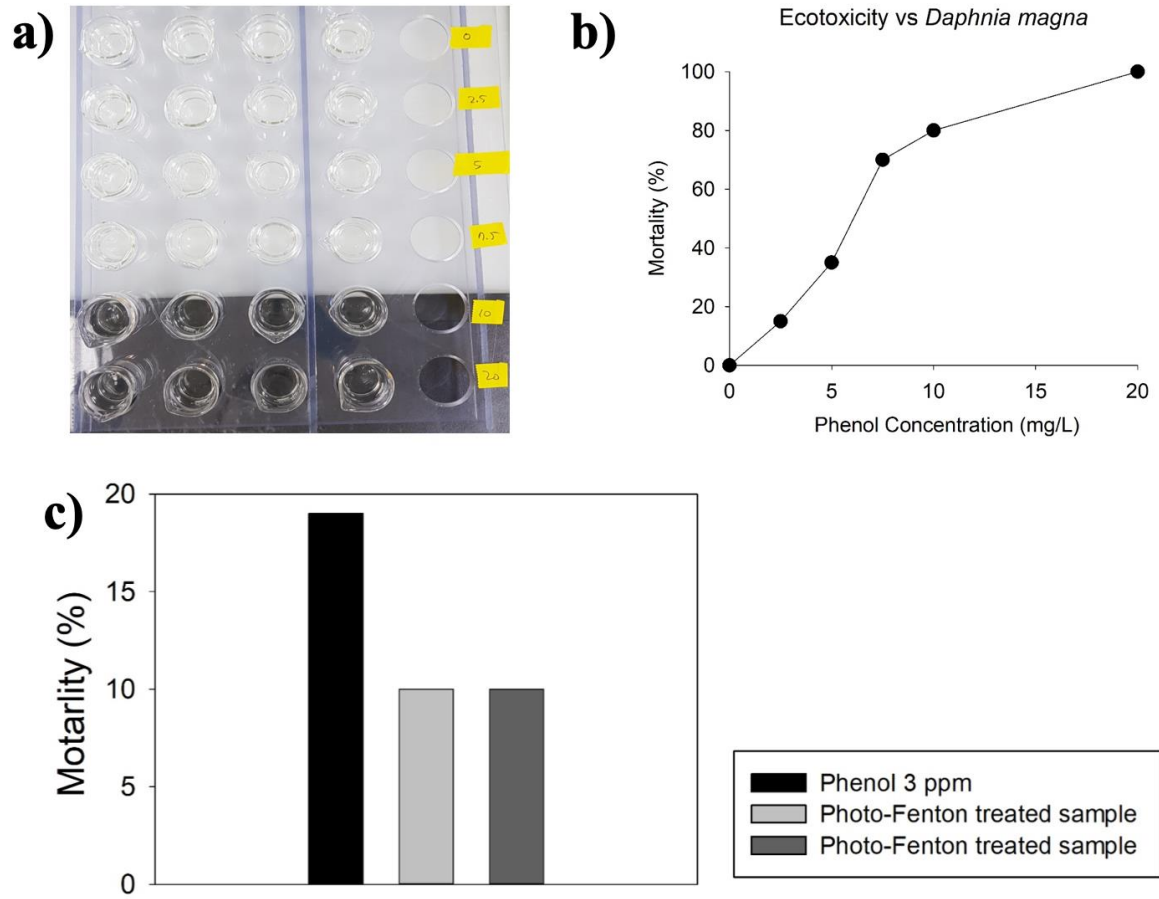

**Figure S1.** Ecotoxicity against *Daphnia magna*: (a) exposure of *D. magna* to different concentrations of phenol, (b) ecotoxicity of phenol against *D. magna*, and (c) ecotoxicity of phenol 3 ppm (initial sample), photo-Fenton-, and photocatalysis-treated samples

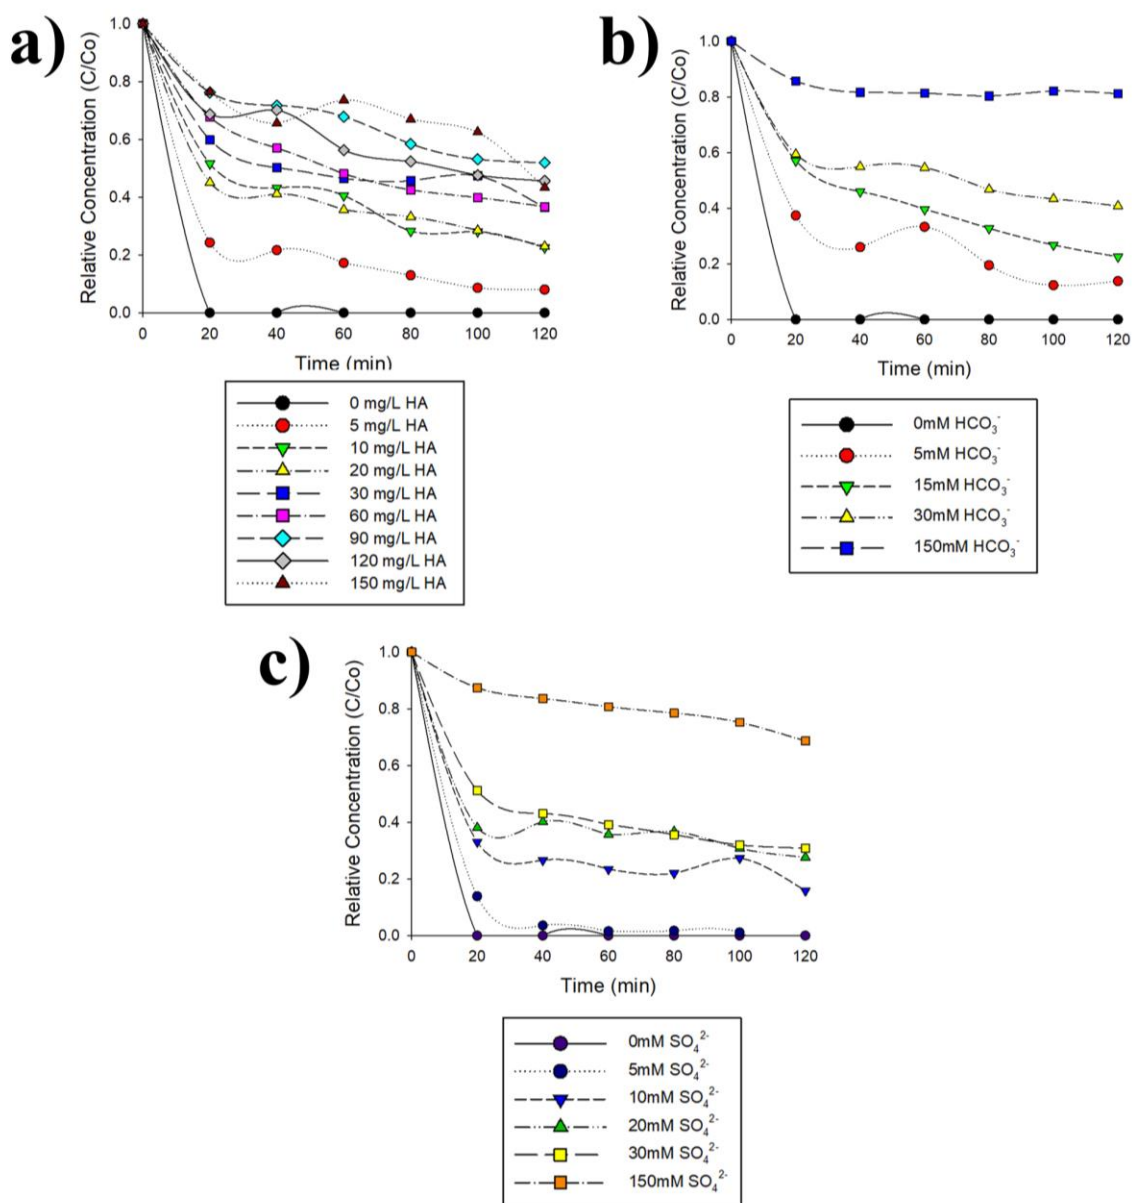

**Figure S2.** Effects of inhibition agents: a) HA, b) HCO<sub>3</sub><sup>-</sup>, and c) SO<sub>4</sub><sup>2-</sup> on photo-Fenton performance of MgAC-Fe<sub>3</sub>O<sub>4</sub> [0.05 g]/TiO<sub>2</sub> hybrid nanocomposites

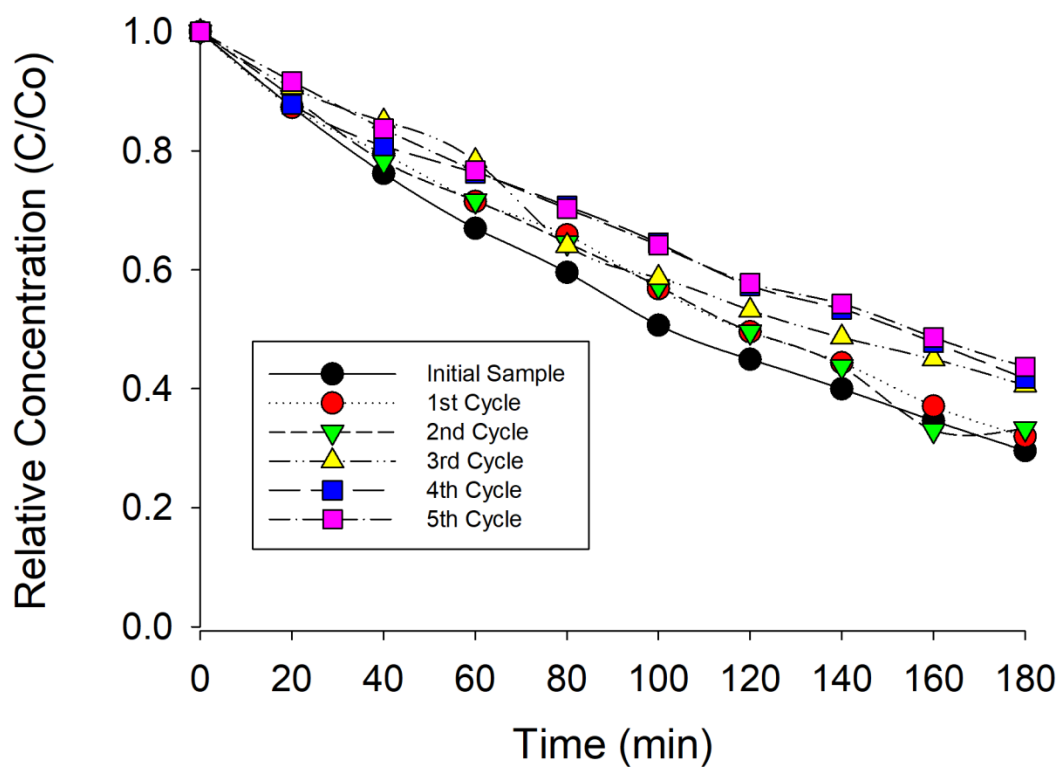

**Figure S3.** Recycling performances of MgAC-Fe<sub>3</sub>O<sub>4</sub> [0.05 g]/TiO<sub>2</sub> on batch mode scale

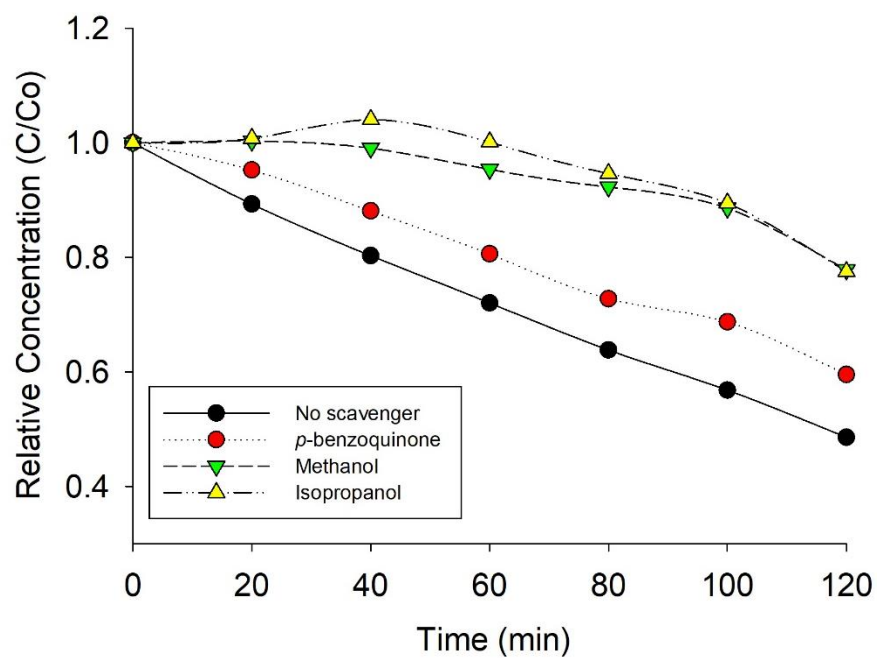

**Figure S4.** Photocatalytic activities of MgAC-Fe<sub>3</sub>O<sub>4</sub> [0.05 g]/TiO<sub>2</sub> against 20 ppm MB in the presence of different reactive species: 0.1 M isopropanol, 0.1 M ethanol, and 5mM *p*-benzoquinone

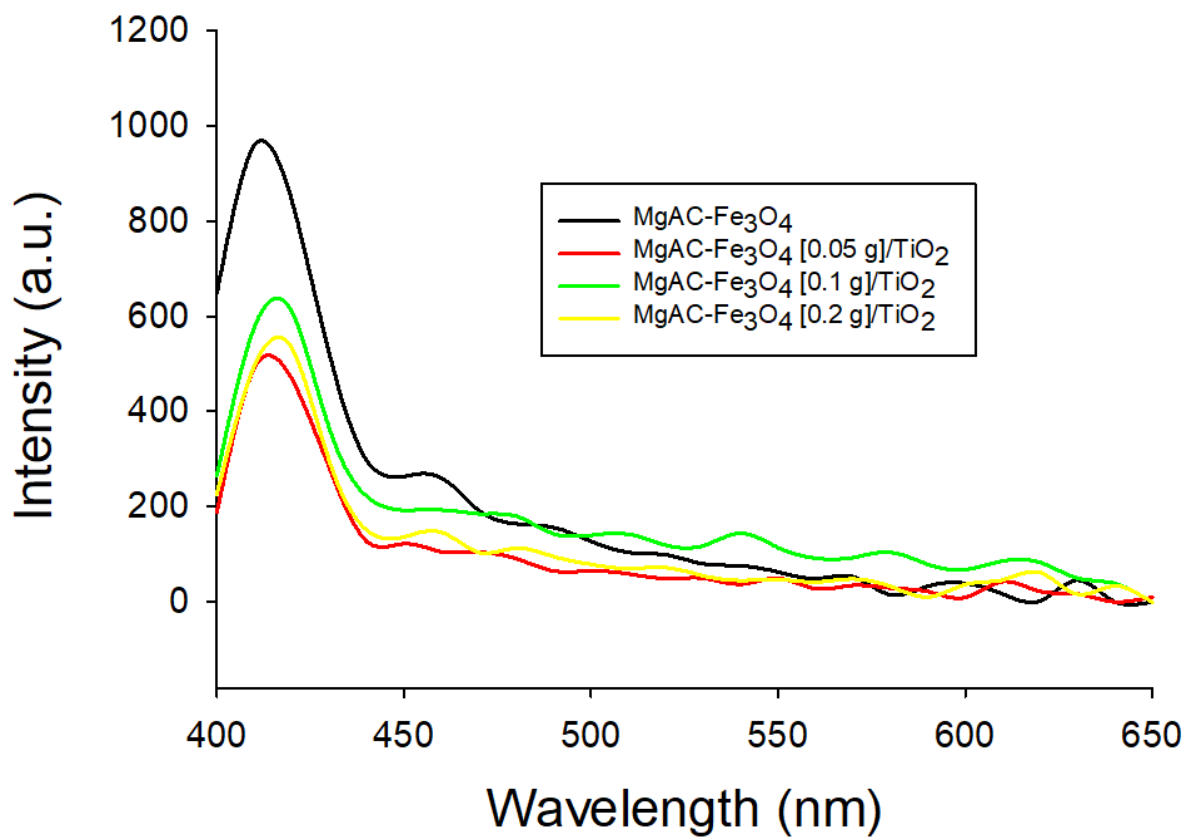

**Figure S5.** Photoluminescence (PL) spectra of MgAC-Fe<sub>3</sub>O<sub>4</sub> and MgAC-Fe<sub>3</sub>O<sub>4</sub>/TiO<sub>2</sub> hybrid nanocomposites ( $\lambda_{\text{ex}} = 365 \text{ nm}$ ).

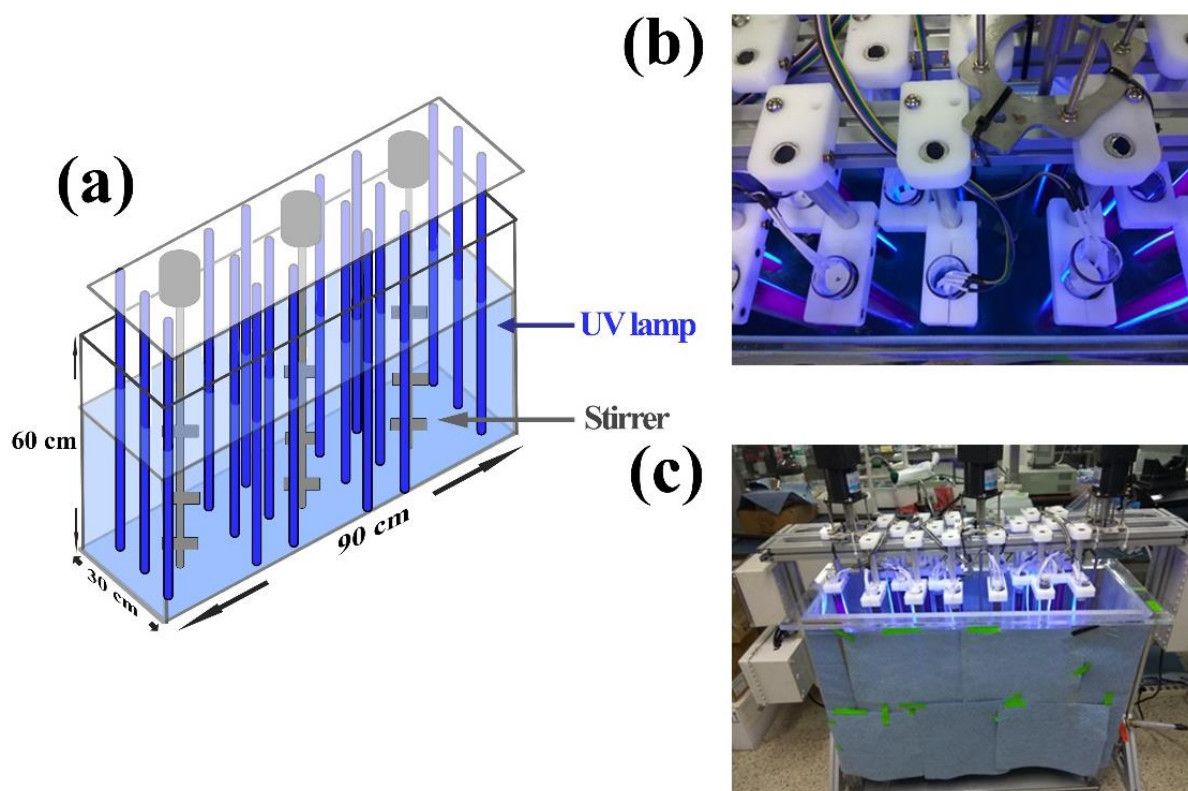

**Figure S6.** (a) Design of reactor for pilot-scale experiment and photos of reactor from (b) above and (c) front

**(a)**

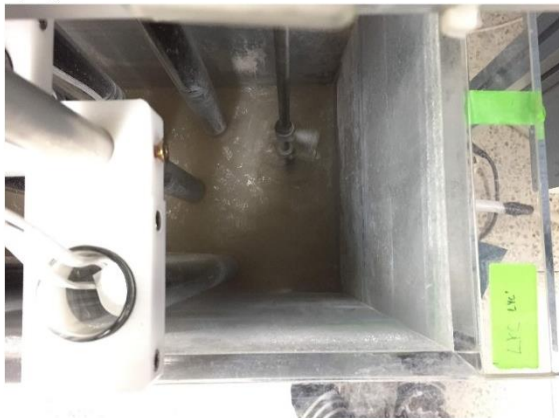

**(b)**

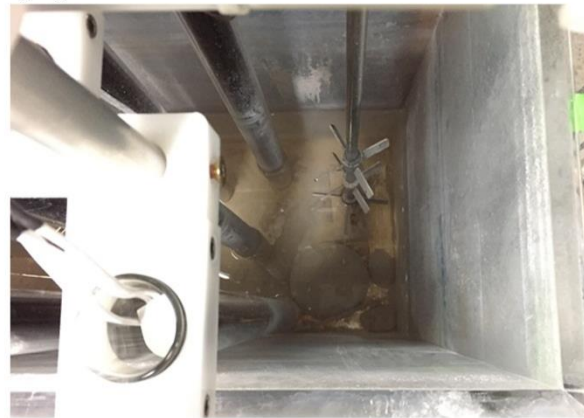

**Figure S7.** Photos of reactor (a) when finishing reaction and (b) after self-precipitation for 24 hours



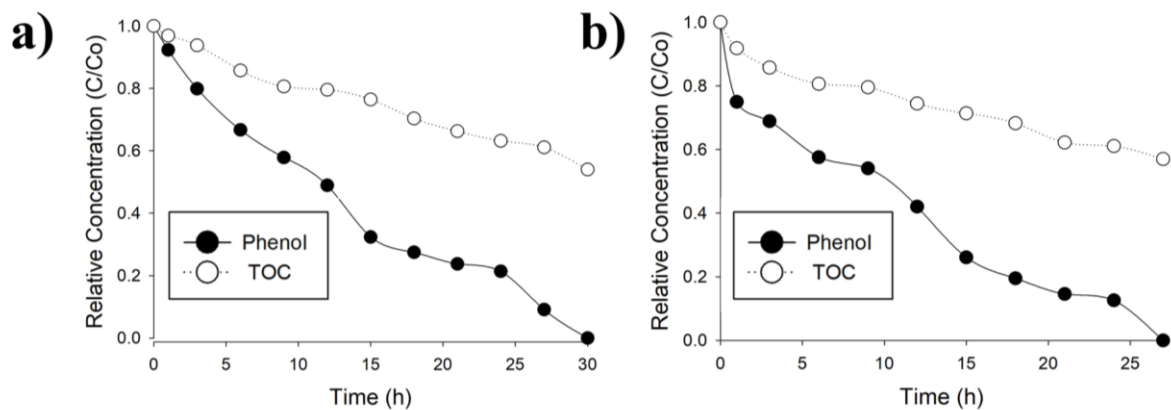

**Figure S8.** Phenol concentration vs. TOC concentration during (a) photo-Fenton and (b) photocatalytic reactions by MgAC-Fe<sub>3</sub>O<sub>4</sub> [0.05 g]/TiO<sub>2</sub> on pilot scale

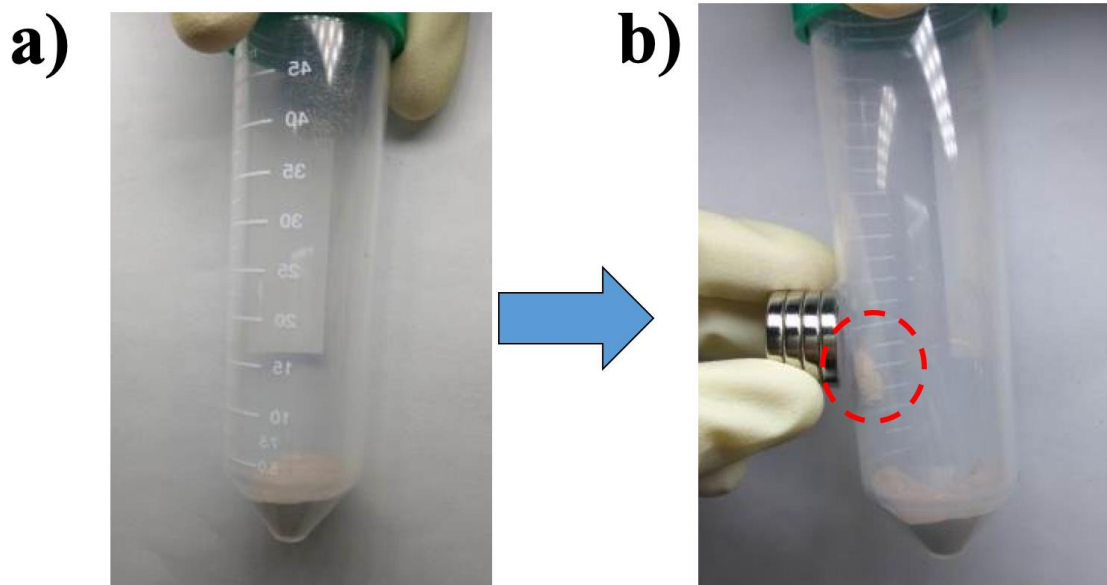

**Figure S9.** MgAC-Fe<sub>3</sub>O<sub>4</sub> [0.05 g]/TiO<sub>2</sub> hybrid nanocomposites (a) before and (b) after applied magnetic field

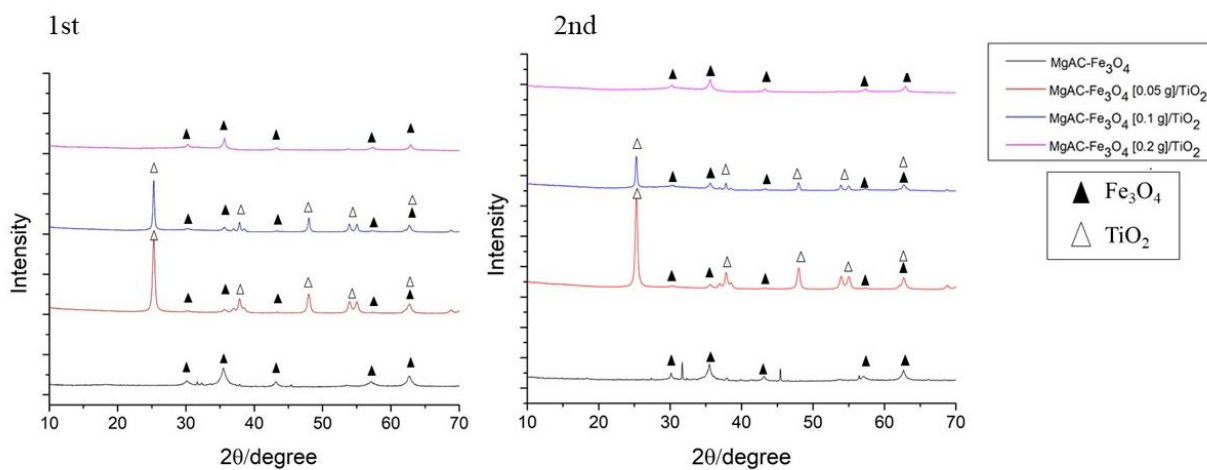

**Figure S10.** XRD was conducted two times to confirm the absence of TiO<sub>2</sub> peaks due to the excess MgAC-Fe<sub>3</sub>O<sub>4</sub> loading.

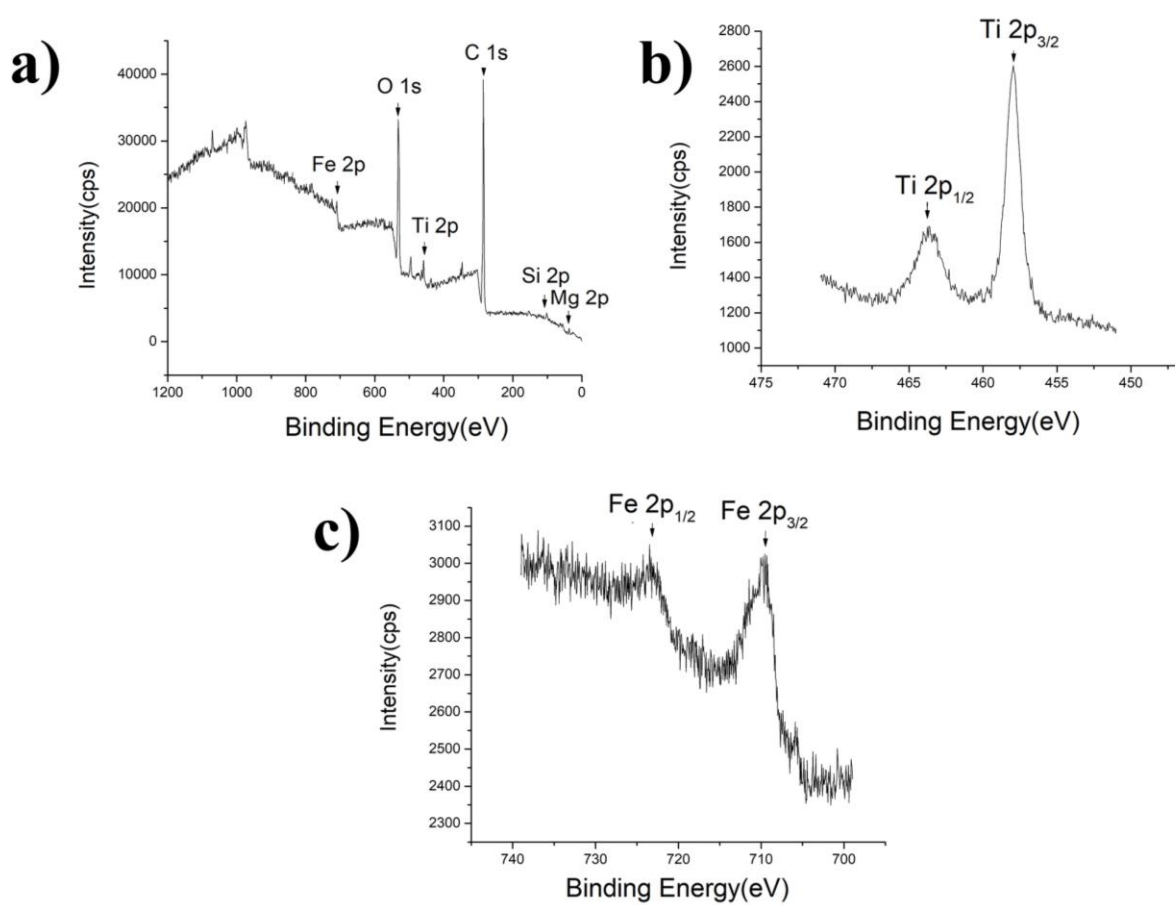

**Figure S11.** XPS spectra of MgAC-Fe<sub>3</sub>O<sub>4</sub> [0.05 g]/TiO<sub>2</sub>: (a) full spectra, (b) Ti 2p region, (c) Fe 2p region

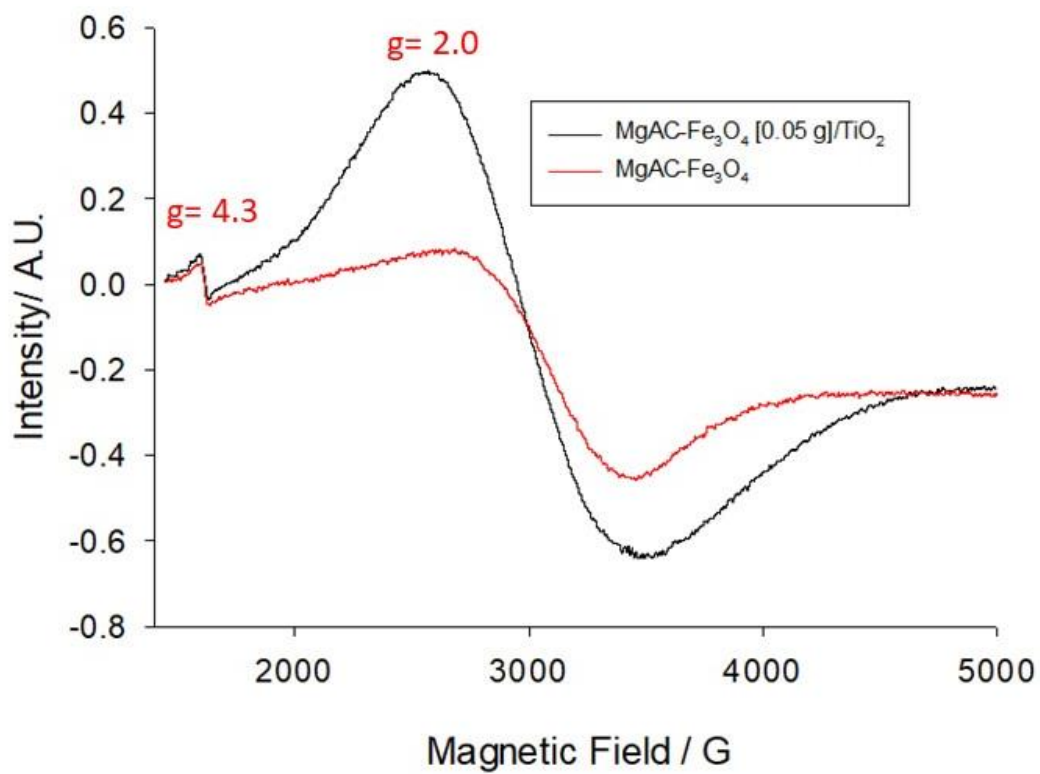

**Figure S12.** ESR spectra of MgAC-Fe<sub>3</sub>O<sub>4</sub> and MgAC-Fe<sub>3</sub>O<sub>4</sub> [0.05 g]/TiO<sub>2</sub>

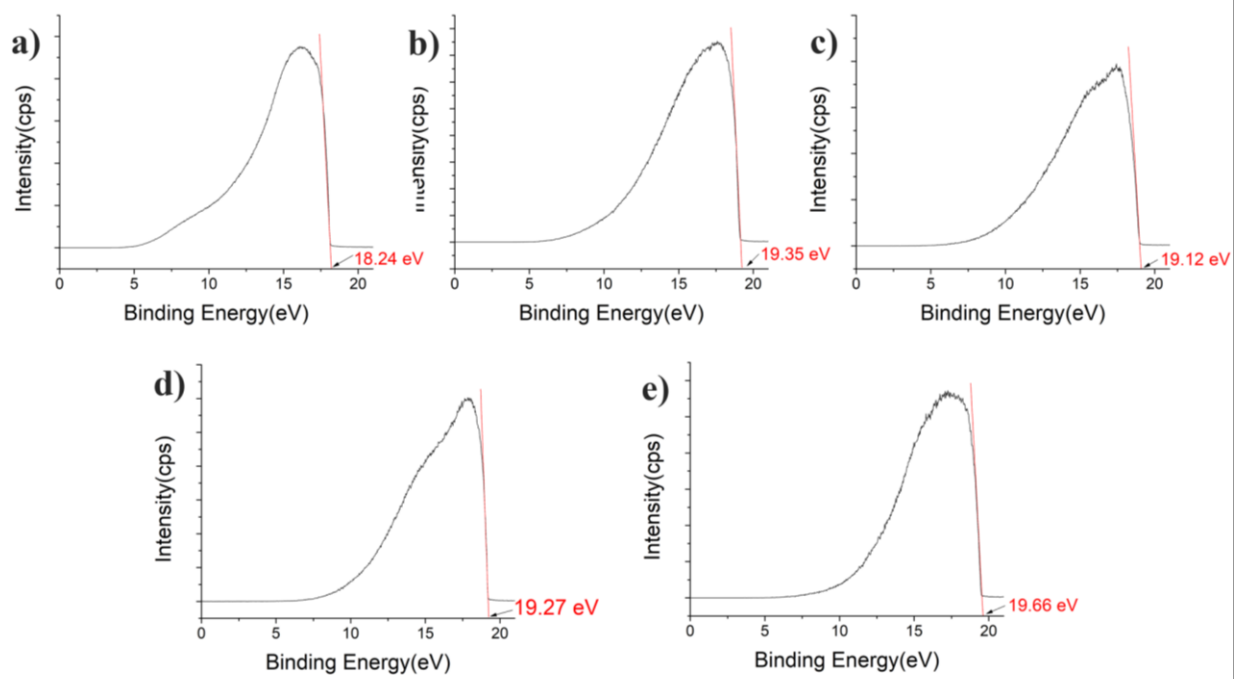

**Figure S13.** UPS spectra and secondary electron cutoff energies ( $E_{cutoff}$ ) of (a) MgAC-Fe<sub>3</sub>O<sub>4</sub>, (b) MgAC-Fe<sub>3</sub>O<sub>4</sub> [0.05 g]/TiO<sub>2</sub>, (c) MgAC-Fe<sub>3</sub>O<sub>4</sub> [0.1 g]/TiO<sub>2</sub>, (d) MgAC-Fe<sub>3</sub>O<sub>4</sub> [0.2 g]/TiO<sub>2</sub>, and (e) MgAC-TiO<sub>2</sub>

**Table S1.** Elemental compositions (wt. %) of as-prepared samples by X-ray fluorescence (XRF) spectrometry

| <b>Sample</b>                      | <b>MgAC-Fe<sub>3</sub>O<sub>4</sub></b><br><b>[0.05 g]/TiO<sub>2</sub></b> | <b>MgAC-Fe<sub>3</sub>O<sub>4</sub></b><br><b>[0.1 g]/TiO<sub>2</sub></b> | <b>MgAC-Fe<sub>3</sub>O<sub>4</sub></b><br><b>[0.2 g]/TiO<sub>2</sub></b> | <b>MgAC-Fe<sub>3</sub>O<sub>4</sub></b> |
|------------------------------------|----------------------------------------------------------------------------|---------------------------------------------------------------------------|---------------------------------------------------------------------------|-----------------------------------------|
| MgO (%)                            | 3.5                                                                        | 3.4                                                                       | 3.5                                                                       | 6.8                                     |
| SiO <sub>2</sub> (%)               | 0.91                                                                       | 0.73                                                                      | 1.1                                                                       | 2.4                                     |
| TiO <sub>2</sub> (%)               | 88.1                                                                       | 81.5                                                                      | 74.3                                                                      | 0.01                                    |
| Fe <sub>3</sub> O <sub>4</sub> (%) | 7.48                                                                       | 14.4                                                                      | 21.2                                                                      | 90.8                                    |

**Table S2.** Work functions of materials in this study

| <b>Sample</b>                                                 | <b>Work function (eV)</b> |
|---------------------------------------------------------------|---------------------------|
| MgAC-Fe <sub>3</sub> O <sub>4</sub>                           | 2.98                      |
| MgAC-Fe <sub>3</sub> O <sub>4</sub> [0.05 g]/TiO <sub>2</sub> | 1.87                      |
| MgAC-Fe <sub>3</sub> O <sub>4</sub> [0.1 g]/TiO <sub>2</sub>  | 2.10                      |
| MgAC-Fe <sub>3</sub> O <sub>4</sub> [0.2 g]/TiO <sub>2</sub>  | 1.98                      |
| MgAC-TiO <sub>2</sub>                                         | 1.56                      |



**Table S3.** Cost estimations

| <b>Product</b>                                                   | <b>Estimated Cost (USD/kg)*</b> |
|------------------------------------------------------------------|---------------------------------|
| MgAC                                                             | 389.80                          |
| MgAC-Fe <sub>3</sub> O <sub>4</sub>                              | 583.45                          |
| MgAC-TiO <sub>2</sub>                                            | 1476.24                         |
| <b>MgAC-Fe<sub>3</sub>O<sub>4</sub> [0.05 g]/TiO<sub>2</sub></b> | <b>1479.80</b>                  |

\*Estimated cost includes Republic of Korea industrial-electrical fees.

\*Estimated cost does not include the cost of 4% H<sub>2</sub>/Ar.
